# Supplementary material for: A shady business in Legumes: Lutein epoxidase enables α-xanthophyll cycling
Source: Research Square preprint supplement (doi:10.21203/rs.3.rs-4745347/v1), 2024-08-08
Supplement: Supplementary file 1 [file 92d28e2df812cdc5ac94912f.xlsx]

## Sheet: Sheet1
Table S5. List of all identified Zeaxanthin Epoxidase (ZEP) and Lutein Epoxidase (LEP) orthologs from species previously shown to accumulate Lx. The genes in this table were used to build the phylogenetic trees in Figures 4 and S4. The groups and orders of the species in this table are organized according to the Angiosperm Phylogeny Goup IV76. Gene IDs in blue represent LEP orthologs, and in red …
Group/Cladea	Ordera	Family	Speciesb	Gene Id (LEP/ZEP ortholog)c,d	Gene annotation in the treec	Sequence homology to GmLEP9 (Identity, Query cover)	Sequence homology to GmZEP17 (Identity, Query cover)	References
Gymnosperms-Ginkgophyta-Ginkgoopsida	Ginkgoales	Ginkgoaceae	Ginkgo biloba	Gb_12152	Ginkgo biloba (2)	68.7%, 66%	73%, 66%	29
				Gb_32627	Ginkgo biloba (1)	67%, 65%	74.7%, 67%
				Gb_34927
Gymnosperms-Pinophyta-Pinopsida	Pinales	Pinaceae	Picea abies	MA_10435467g0010	Picea abies	66.8%, 66%	72%, 55%	Czeczuga 1986
				MA_10435618g0010
			Pseudotsuga menziesii	PSME_26415	Pseudotsuga menziesii	66.6%, 66%	71.4%, 66%	29
				PSME_49639
			Pinus labertiana	c80703_g1_i1	Pinus labertiana (2)	66.7%, 67%	71.3%, 64%	29
				PILAhm_001037-RA	Pinus labertiana (1)	66.8%, 65%	72.2%, 81%
			Pinus taeda	PITA_00347	Pinus taeda	67%, 65%	72%, 81%	29
			Abies alba	AALBA5B053609P1				Czeczuga 1986
				AALBA5B073468P1
				AALBA5B1062231P1
				AALBA5B449205P1
				AALBA5B570245P1
	Cupressales	Cupressaceae	Thuja plicata	Thupl.29379321s0005	Thuja plicata	67%, 68%	72.8%, 72%	Czeczuga 1986
Angiosperms-Magnoliids	Magnoliales	Magnoliaceae	Liriodendron tulipifera	LitulAlt.01G214400	Liriodendron tulipifera (2)	72%, 67%	66.8%, 48%	29
				LitulAlt.02G162900	Liriodendron tulipifera (1)	66%, 65%	76.8%, 84%
			Magnolia biondii	MBI01_g33890_MAGBIO	Magnolia biondii (2)	69.8%, 76%	67%, 34%	29
				MBI03_g13473_MAGBIO	Magnolia biondii (1)	66.8%, 65%	76.7%, 84%
				MBI01_g01345_MAGBIO
	Laurales	Lauraceae	Cinnamomum kanehirae	CKAN_00633900	Cinnamomum kanehirae (2)	73.7%, 69%	68%, 46%	19
				CKAN_02178300	Cinnamomum kanehirae (1)	67%, 46%	73.6%, 84%
			Persea americana	17886_g	Persea americana (2)	73.5%, 69%	67.5%, 47%	19
				g32353	Persea americana (1)	68%, 46%	76.2%, 77%
				7430_g
Angiosperms-Monocots	Asparagales	Orchidaceae	Vanilla planifolia	HPP92_010971	Vanilla planifolia	65%, 65%	73%, 84%	28
	Poales	Poaceae	Triticum aestivum	Traes_2AL_5FF7D6940	Triticum aestivum (2)	66.2%, 38%	72.3%, 75%	18
				Traes_2BL_047344CB6	Triticum aestivum (1)	65.3%, 38%	72.1%, 72%
				Traes_2DL_AE9C5933A
Angiosperms-Eudicots	Proteales	Nelumbonaceae	Nelumbo nucifera	Nn5g30293	Nelumbo nucifera	65.6%, 65%	76.7%, 86%	19
				Nn7g36022
				Nn4g23554
	Trochodendrales	Trochodendraceae	Trochodendron aralioides	TAR633G2681	Trochodendron aralioides	74.9%, 80%	68.4%, 48%	29
				TAR628G1519
				TAR376G0143
				TAR376G0016
				TAR628G0235
Angiosperms-Core Eudicots-Rosids	Vitales	Vitaceae	Vitis vinifera	VIT_213s0156g00350	Vitis vinifera (2)	75.8%, 87%	68.4%, 46%	28
				VIT_207s0031g00620	Vitis vinifera (1)	65.9%, 65%	79.2%, 85%
	Fabales	Fabaceae	Glycine max	Glyma.09G000600	Glycine max (3)		66%, 46%	Legumes referred to in the manuscript
				Glyma.17G174500	Glycine max (1)	66%, 65%
				Glyma.11G055700	Glycine max (2)	66%, 68%	84.4%, 100%
			Glycine soja	09G000400	Glycine soja (4)	99.8%, 100%	66%, 46%
				17G156300	Glycine soja (1)	66%, 65%	99.9%, 100%
				11G050800	Glycine soja (3)	65.9%, 68%	84.5%, 100%
				01G148400	Glycine soja (2)	65%, 44%	80.4%, 93%
				12G201500
			Medicago truncatula	Medtr4g022850	Medicago truncatula (2)	85.7%, 88%	67.5%, 46%
				Medtr5g017350	Medicago truncatula (1)	66.2%, 66%	85.6%, 91%
			Lupinus albus	Lalb_Chr01g0008141		84.3%, 87%	67%, 46%
				Lalb_Chr00c02g0404101		64.8%, 66%	86.3%, 98%
			Lotus japonicus	Lj3g0027459		87.3%, 88%	67.5%, 34%
				Lj2g0007356		66.2%, 66%	85.4%, 90%
				Lj4g0006017		65.5%, 66%	85.7%, 99%
			Vigna unguiculata	Vigun11g002300		88.5%, 100%	66.7%, 46%
				Vigun03g277500		66%, 66%	92.9%, 99%
				Vigun02g143900		65.7%, 68%	85.3%, 91%
			Phaseolus vulgaris	Phvul.011G214600		88.2%, 100%	67.1%, 46%
				Phvul.003G243800		65.7%, 65%	92.4%, 100%
				Phvul.002G018700		65.6%, 68%	83.3%, 100%
			Trifolium pratense	Tp57577_TGAC_v2_gene19064		66.6%, 66%	84.1%, 100%
	Rosales	Moraceae	Ficus carica	FCD_00006349-RA				29
				FCD_00006348-RA
		Rosaceae	Prunus dulcis	Prudul26B019653	Prunus dulcis (2)	75.5%, 76%	65%, 43%	29
				Prudul26B029871	Prunus dulcis (3)	73%, 85%	65.5%, 46%
				Prudul26B002700	Prunus dulcis (1)	66%, 66%	80%, 89%
	Fagales	Fagaceae	Castanea mollissima Mahogany	CmMahoganyH1.11G190900	Castanea mollissima Mahogany (3)	76.6%, 85%	67.7%, 46%	29
				CmMahoganyH1.09G158200	Castanea mollissima Mahogany (2)	72%, 72%	64%, 46%
				CmMahoganyH1.02G162200	Castanea mollissima Mahogany (1)	66%, 68%	81%, 84%
			Castanea dentata	Caden.11G262000	Castanea dentata (2)	76%, 85%	67.8%, 46%	29
				Caden.02G190800	Castanea dentata (1)	66%, 67%	80.9%, 84%
				Caden.09G189400
			Castanea mollissima Nanking	CmNankingH1.11G192900	Castanea mollissima Nanking (2)	76.4%, 85%	67.7%, 46%	29
				CmNankingH1.02G163400	Castanea mollissima Nanking (1)	66%, 66%	81%, 84%
			Quercus rubra	Qurub.04G009400	Quercus rubra (2)	76.8%, 85%	68%, 46%	29
				Qurub.06G070600	Quercus rubra (1)	66%, 67%	81%, 84%
			Quercus robur	Qrob_P0065920	Quercus robur (2)	76%, 85%	68%, 46%	29
				Qrob_P0163070	Quercus robur (1)	66.6%, 67%	80.4%, 84%
			Fagus sylvatica	FSB014790601	Fagus sylvatica (2)	81.2%, 71%	68%, 32%	18
				FSB013660901	Fagus sylvatica (1)	65.2%, 67%	80.8%, 87%
				FSB011813701
				FSB011071501
				FSB014790301
	Cucurbitales	Cucurbitaceae	Cucumis sativus	Cucsa.367060	Cucumis sativus	66%, 66%	76.5%, 84%	19
			Cucumis melo	MELO3C020872				19
	Malpighiales	Salicaceae	Populus trichocarpa	Potri.001G229100	Populus trichocarpa (3)	73.8%, 89%	68.6%, 46%	29
				Potri.007G044300	Populus trichocarpa (2)	66%, 66%	77.8%, 86%
				Potri.005G138400	Populus trichocarpa (1)	66%, 67%	78.6%, 87%
			Salix purpurea	Sapur.016G123500	Salix purpurea (3)	75.6%, 85%	68.4%, 46%	29
				Sapur.007G041400	Salix purpurea (2)	66%, 66%	78.8%, 85%
				Sapur.005G126100	Salix purpurea (1)	66%, 68%	77.8%, 87%
	Sapindales	Sapindaceae	Acer truncatum	Atru.chr11.2692	Acer truncatum (2)	75.3%, 78%	66.6%, 47%	29
				Atru.chr3.325	Acer truncatum (1)	65.5%, 66%	78.3%, 85%
		Anacardiaceae	Pistacia vera	EVM0026529	Pistacia vera (2)	75%, 83%	67%, 47%	29
				EVM0005626	Pistacia vera (1)	66%, 68%	79.5%, 85%
			Anacardium occidentale	Anaoc.0017s0407	Anacardium occidentale	66.8%, 67%	79%, 83%	28
				Anaoc.0001s0845
		Rutaceae	Poncirus trifoliata	Ptrif.0007s0434	Poncirus trifoliata (2)	66%, 68%	77.4%, 85%	18
				Ptrif.0007s0454	Poncirus trifoliata (1)	65.4%, 66%	75.8%, 88%
			Citrus sinensis	orange1.1g005770m.g	Citrus sinensis	66.3%, 68%	75.8%, 85%	18
				orange1.1g015167m.g
				orange1.1g020277m.g
Angiosperms-Core Eudicots-Asterids	Ericales	Ericaceae	Rhododendron simsii	Rhsim10G0117200	Rhododendron simsii	66.3%, 48%	77.7%, 86%	29
				Rhsim07G0050700
			Vaccinium darrowii	Vadar_g4448	Vaccinium darrowii	75%, 87%	67.3%, 46%	29
				Vadar_g28661
			Vaccinium macrocarpon	vmacro13619	Vaccinium macrocarpon	74.2%, 87%	67%, 45%	29
				vmacro05340
		Actinidiaceae	Actinidia chinensis	Actinidia31701	Actinidia chinensis (2)	74.6%, 88%	68.6%, 46%	29
				Actinidia16481	Actinidia chinensis (1)	66%, 67%	79%, 87%
		Theaceae	Camellia sinensis	CSS0041624	Camellia sinensis (2)	75.4%, 86%	68.2%, 46%	29
				CSS0031288	Camellia sinensis (1)	65.4%, 67%	79.5%, 87%
				CSS0022842
	Asterales	Asteraceae	Lactuca sativa	Lsat_1_v5_gn_9_111181	Lactuca sativa (2)	68.3%, 68%	66.7%, 45%	18
				Lsat_1_v5_gn_3_90761	Lactuca sativa (1)	65.4%, 68%	73.2%, 83%
	Dipsacales	Caprifoliaceae	Lonicera japonica	GWHTAAZE014612	Lonicera japonica	65%, 66%	78%, 82%	29
				GWHTAAZE031682i
	Lamiales	Acanthaceae	Avicennia marina	MSTRG.23744	Avicennia marina	64.3%, 67%	76.3%, 82%	28
				MSTRG.2882
		Oleaceae	Olea europaea	Oeu031955	Olea europaea	65.3%, 67%	75.7%, 83%	18
				Oeu018405
	Solanales	Solanaceae	Solanum lycopersicum	Solyc02G002624	Solanum lycopersicum	66.3%, 47%	75.2%, 83%	19
